# Supplementary material
Source: publisher figshare collection journal article supplement (https://future-science-group.figshare.com/ndownloader/files/23742995)
Supplement: Supplementary file 1 [file 23742995]

| Calibrated wavelength (nm) | | 474 | Uncertainty (%) k=2 |
| --- | --- | --- | --- |
| Standard Light | Radiant-flux standard wavelength (nm) | 474 |  |
| Total radiant flux (W) | 6.58x10-10 | 10.0 |
| Total radiant flux for imaging system calibration (W) | 1.64x10-10 | 1.2 |
| Radiation pattern | cos1.33θ |  |
| Photon energy (J) | 4.19x10-19 |  |
| Number of photons / s | 3.92x108 |  |
| Telecentric Lens | NA | 0.0930 |  |
| Collection efficiency | 0.0101 |  |
| Camera | CCD PreAmpGain | 4 |  |
| Binning | 2x2 |  |
| CCD exposure time (s) | 0.5 |  |
| Pixel size(μm) | 13 |  |
| Average relative light intensity (RLUs)  of 5 images | 4.98x106 | 1.8 |
| Absolute sensitivity  (photons / RLU/ pixel) | 0.398 | 10.2 |
| BLI System | Optical magnification | 1 | 10.2 |
| Image size / pixel (μm) | 13 |
| Image area / pixel (μm2) | 169 |
| Absolute sensitivity  (photons / μm2) | 2.36x10-3 |
| Absolute sensitivity  (photons / mm2) | 2.36x103 |

Table 1
